# Supplementary material
Source: PubMed Central journal article supplement (PMC4352311)
Supplement: NIHMS659355-supplement-Suppl_7.pdf [file NIHMS659355-supplement-Suppl_7.pdf]

**Table S5: A representative list of miR-145-mediated proteomic changes**

| <b>Gene<br/>Symbol</b> | <b>Description</b>                                           | <b>miR145/<br/>Control</b> | <b>CDS<sup>#</sup><br/>Match</b> | <b>3'UTR<sup>Δ</sup><br/>Match</b> | <b>8mer<sup>*</sup><br/>Match</b> |
|------------------------|--------------------------------------------------------------|----------------------------|----------------------------------|------------------------------------|-----------------------------------|
| CDK5RAP2               | CDK5 regulatory subunit-associated protein 2                 | 0.13                       | 4                                | 0                                  | 0                                 |
| KRT10                  | keratin, type I cytoskeletal 10                              | 0.14                       | 1                                | 0                                  | 0                                 |
| CNGA4                  | cyclic nucleotide-gated cation channel alpha-4               | 0.28                       | 0                                | 0                                  | 0                                 |
| RNF213                 | protein ALO17                                                | 0.30                       | 8                                | 3                                  | 0                                 |
| SPTLC1                 | serine palmitoyltransferase 1                                | 0.36                       | 3                                | 1                                  | 0                                 |
| PRPF39                 | pre-mRNA-processing factor 39                                | 0.37                       | 0                                | 0                                  | 0                                 |
| C18orf25               | hypothetical protein LOC147339                               | 0.38                       | 1                                | 1                                  | 0                                 |
| ABCC1                  | multidrug resistance-associated protein 1                    | 0.39                       | 2                                | 1                                  | 0                                 |
| SWAP70                 | switch-associated protein 70                                 | 0.40                       | 5                                | 3                                  | 1                                 |
| RPA1                   | replication protein A 70 kDa DNA-binding subunit             | 0.42                       | 1                                | 1                                  | 1                                 |
| YTHDF2                 | YTH domain family protein 2                                  | 0.43                       | 2                                | 2                                  | 2                                 |
| TRMT6                  | tRNA (adenine-N(1)-)-methyltransferase non-catalytic subunit | 0.43                       | 1                                | 0                                  | 0                                 |
| EP300                  | histone acetyltransferase p300                               | 0.43                       | 0                                | 0                                  | 0                                 |
| SPTAN1                 | spectrin alpha chain                                         | 0.43                       | 0                                | 0                                  | 0                                 |
| FSCN1                  | fascin                                                       | 0.43                       | 2                                | 4                                  | 3                                 |
| GFPT2                  | glucosamine--fructose-6-phosphate aminotransferase           | 0.44                       | 0                                | 0                                  | 0                                 |
| SEC24C                 | protein transport protein Sec24C                             | 0.45                       | 2                                | 1                                  | 0                                 |
| COG4                   | conserved oligomeric Golgi complex subunit 4                 | 0.45                       | 0                                | 0                                  | 0                                 |
| GTF2H3                 | general transcription factor IIH subunit 3                   | 0.45                       | 0                                | 0                                  | 0                                 |
| PPP1R9B                | neurabin-2                                                   | 0.46                       | 2                                | 3                                  | 0                                 |
| USP11                  | ubiquitin carboxyl-terminal hydrolase 11                     | 0.47                       | 0                                | 0                                  | 0                                 |
| C6orf108               | deoxyribonucleoside 5'-monophosphate N-glycosidase           | 0.47                       | 0                                | 0                                  | 0                                 |
| NACC1                  | nucleus accumbens-associated protein 1                       | 0.48                       | 0                                | 1                                  | 0                                 |
| KRT1                   | keratin, type II cytoskeletal 1                              | 0.49                       | 0                                | 0                                  | 0                                 |
| SPTBN1                 | spectrin beta chain, brain 1                                 | 0.50                       | 6                                | 1                                  | 0                                 |
| ABCE1                  | ATP-binding cassette sub-family E member 1                   | 0.50                       | 0                                | 0                                  | 0                                 |
| MCMBP                  | chromosome 10 open reading frame 119                         | 0.50                       | 0                                | 1                                  | 0                                 |

|                                                                                                                                                    |                                                     |      |   |   |   |
|----------------------------------------------------------------------------------------------------------------------------------------------------|-----------------------------------------------------|------|---|---|---|
| POLD3                                                                                                                                              | DNA polymerase delta subunit 3                      | 0.50 | 0 | 1 | 0 |
| SET                                                                                                                                                | protein SET                                         | 0.52 | 0 | 1 | 0 |
| PODXL                                                                                                                                              | podocalyxin                                         | 0.58 | 1 | 4 | 0 |
| TPM3                                                                                                                                               | tropomyosin alpha-3 chain                           | 0.62 | 0 | 3 | 3 |
| YES1                                                                                                                                               | proto-oncogene tyrosine-protein kinase Yes          | 0.64 | 0 | 0 | 0 |
| AP1G1                                                                                                                                              | AP-1 complex subunit gamma-1                        | 0.67 | 0 | 4 | 2 |
| MCM2                                                                                                                                               | DNA replication licensing factor                    | 0.67 | 0 | 0 | 0 |
| HAT1                                                                                                                                               | histone acetyltransferase type B catalytic subunit  | 0.67 | 2 | 0 | 0 |
| TOP2B                                                                                                                                              | DNA topoisomerase 2-beta                            | 1.50 | 3 | 0 | 0 |
| BCL2L12                                                                                                                                            | bcl-2-like protein 12                               | 1.54 | 0 | 0 | 0 |
| COX3                                                                                                                                               | cytochrome c oxidase subunit III                    | 1.55 | 0 | 0 | 0 |
| COX11                                                                                                                                              | cytochrome c oxidase assembly protein COX11         | 1.55 | 1 | 0 | 0 |
| MRPS28                                                                                                                                             | mitochondrial 28S ribosomal protein S28             | 1.75 | 0 | 0 | 0 |
| KIRREL                                                                                                                                             | kin of IRRE-like protein 1                          | 2.08 | 0 | 0 | 0 |
| SUN2                                                                                                                                               | SUN domain-containing protein 2                     | 2.11 | 0 | 0 | 0 |
| NSUN5                                                                                                                                              | putative methyltransferase NSUN5                    | 2.17 | 0 | 0 | 0 |
| GOLIM4                                                                                                                                             | Golgi integral membrane protein 4                   | 2.26 | 1 | 0 | 0 |
| EPS8                                                                                                                                               | epidermal growth factor receptor kinase substrate 8 | 2.35 | 1 | 0 | 0 |
| CLDN11                                                                                                                                             | claudin-11                                          | 2.41 | 0 | 0 | 0 |
| COX4I1                                                                                                                                             | cytochrome c oxidase subunit 4                      | 3.40 | 0 | 1 | 0 |
| COX4I1                                                                                                                                             | cytochrome c oxidase subunit 4                      | 3.40 | 0 | 1 | 0 |
| #: coding sequence; Δ: 3'-untranslated region; *: perfect complementarity between first 8 nt at the 5' end of miR-145 and the 3'UTR of transcripts |                                                     |      |   |   |   |
