# Supplementary material
Source: PubMed Central journal article supplement (PMC4352311)

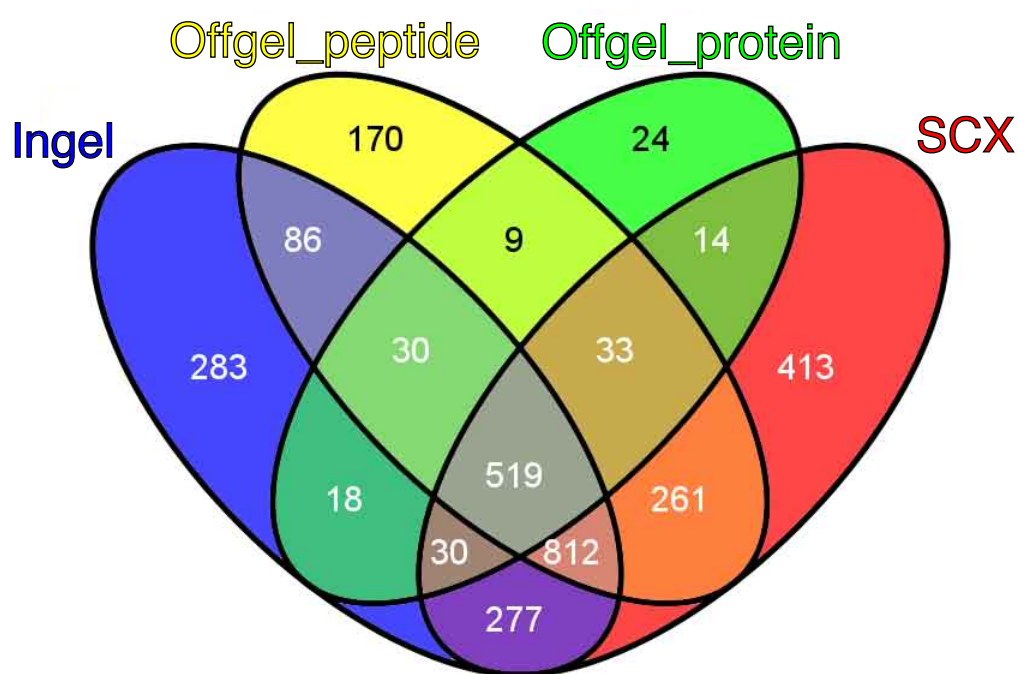

Supplement: NIHMS659355-supplement-Suppl_1.pdf [file NIHMS659355-supplement-Suppl_1.pdf]
